# Supplementary material for: Pilot Study on Poultry Meat from Antibiotic Free and Conventional Farms: Can Metagenomics Detect Any Difference?
Source: MDPI journal article supplement (doi:10.3390/foods11030249), 2022-01-18
Supplement: s1 [file s1]

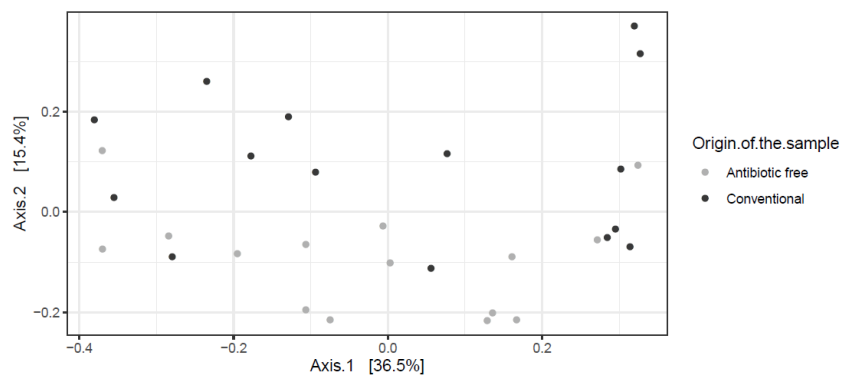

**Figure S1.** Bray-Curtis dissimilarity plots showing the genera detected on carcasses from the conventional and antibiotic free farm.

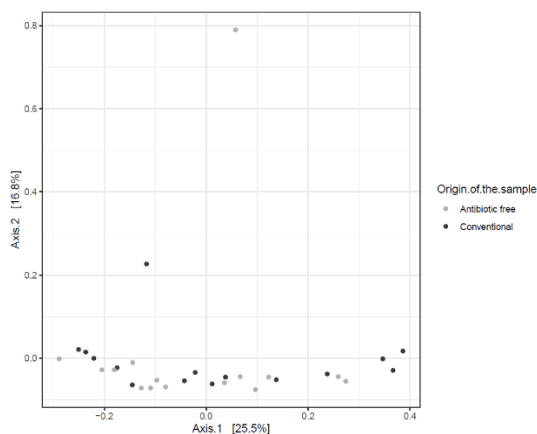

**Figure S2.** Bray-Curtis plot beta diversity of functional genes in the carcasses of birds reared in the antibiotic free and conventional farm.

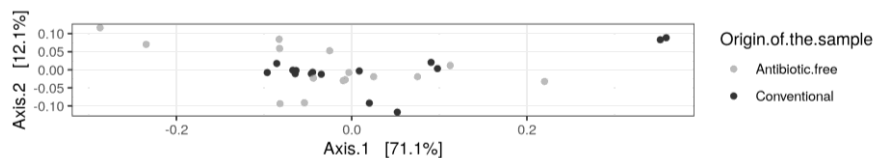

**Figure S3.** Beta diversity of carcasses samples shown as PCoA of Bray-Curtis diversity computed based on the AMR gene family abundances normalized with DESeq2.

**Table S1.** Numbers identifying the tested broilers during slaughtering and corresponding metagenome numbers for the caeca and the carcass samples.

| Broiler number | Type of farm    | Metagenome number for the caeca sample | Metagenome number for the carcass sample |
|----------------|-----------------|----------------------------------------|------------------------------------------|
| 31             | Conventional    | 1343                                   | 1280                                     |
| 32             | Conventional    | 1344                                   | 1281                                     |
| 33             | Conventional    | 1345                                   | 1282                                     |
| 34             | Conventional    | 1346                                   | 1283                                     |
| 35             | Conventional    | 1347                                   | 1284                                     |
| 36             | Conventional    | 1348                                   | 1285                                     |
| 37             | Conventional    | 1349                                   | 1286                                     |
| 38             | Conventional    | 1350                                   | 1287                                     |
| 39             | Conventional    | 1351                                   | 1288                                     |
| 40             | Conventional    | 1352                                   | 1289                                     |
| 41             | Conventional    | 1353                                   | 1290                                     |
| 42             | Conventional    | -                                      | 1291                                     |
| 43             | Conventional    | 1355                                   | 1292                                     |
| 44             | Conventional    | 1356                                   | 1293                                     |
| 45             | Conventional    | 1357                                   | 1294                                     |
| 46             | Antibiotic free | 1358                                   | 1295                                     |
| 47             | Antibiotic free | 1359                                   | 1296                                     |
| 48             | Antibiotic free | 1360                                   | 1297                                     |
| 49             | Antibiotic free | 1361                                   | 1298                                     |
| 50             | Antibiotic free | 1362                                   | 1299                                     |
| 51             | Antibiotic free | 1363                                   | 1300                                     |
| 52             | Antibiotic free | 1364                                   | 1301                                     |
| 53             | Antibiotic free | 1365                                   | 1302                                     |
| 54             | Antibiotic free | 1366                                   | 1303                                     |
| 55             | Antibiotic free | 1367                                   | 1304                                     |
| 56             | Antibiotic free | 1368                                   | 1305                                     |
| 57             | Antibiotic free | 1369                                   | 1306                                     |
| 58             | Antibiotic free | 1370                                   | 1307                                     |
| 59             | Antibiotic free | 1371                                   | 1308                                     |
| 60             | Antibiotic free | 1372                                   | 1309                                     |

**Table S2.** Normalized mean (DESeq2 normalized counts) of the top 20 genera significantly different ( $p < 0.05$ ) in the caeca of the birds reared in the conventional and antibiotic-free farm.

| Genus                     | Norm_mean_<br>conventional | Norm_mean_<br>antibiotic free | p-value |
|---------------------------|----------------------------|-------------------------------|---------|
| <i>Alistipes</i>          | 121394.483                 | 201764.198                    | 0.00    |
| <i>Alkaliphilus</i>       | 65854.658                  | 37406.434                     | 0.00    |
| <i>Anaerotruncus</i>      | 81830.348                  | 141769.053                    | 0.00    |
| <i>Bacillus</i>           | 121574.408                 | 80982.300                     | 0.00    |
| <i>Bacteroides</i>        | 903112.032                 | 5541950.681                   | 0.00    |
| <i>Coprococcus</i>        | 56576.507                  | 94133.578                     | 0.00    |
| <i>Desulfitobacterium</i> | 83821.616                  | 49267.150                     | 0.00    |
| <i>Dorea</i>              | 69937.780                  | 121675.154                    | 0.00    |

|                        |            |            |      |
|------------------------|------------|------------|------|
| <i>Escherichia</i>     | 40613.940  | 215143.602 | 0.00 |
| <i>Ethanoligenens</i>  | 126272.735 | 80004.036  | 0.00 |
| <i>Holdemania</i>      | 87562.749  | 113518.336 | 0.00 |
| <i>Lactobacillus</i>   | 162869.829 | 297992.157 | 0.02 |
| <i>Parabacteroides</i> | 54047.672  | 557109.972 | 0.00 |
| <i>Prevotella</i>      | 41748.154  | 697359.162 | 0.00 |
| <i>Roseburia</i>       | 95006.083  | 151647.561 | 0.00 |
| <i>Ruminococcus</i>    | 522286.960 | 806960.484 | 0.00 |
| <i>Streptococcus</i>   | 122827.116 | 90076.971  | 0.01 |
| <i>Subdoligranulum</i> | 342496.625 | 505311.498 | 0.00 |

**Table S3.** Mean values of the InvSimpson, Shannon, Chao1 indexes quantified for the genera identified in the caeca of birds from the conventional and the antibiotic free farm.

|                      | InvSimpson | Shannon | Chao1   |
|----------------------|------------|---------|---------|
| Mean_Conventional    | 13.733     | 3.747   | 559.631 |
| Mean_Antibiotic free | 7.08       | 3.067   | 554.05  |

**Table S4:** Norm\_Mean (DESeq2 normalized counts) values of the top 20 functional genes significantly different ( $p < 0.05$ ) in the caeca of the birds reared in the conventional and antibiotic-free farm.

| Level function                                                                 | Norm_Mean_<br>conventional | Norm_Mean_<br>antibiotic free | p-value |
|--------------------------------------------------------------------------------|----------------------------|-------------------------------|---------|
| Beta-galactosidase (EC 3.2.1.23)                                               | 7282.341                   | 0                             | 0.00    |
| Chaperone proteinDnaK                                                          | 9293.178                   | 12738.485                     | 0.00    |
| DNA topoisomerase III (EC 5.99.1.2) in PFGI-1-like cluster                     | 2.005                      | 0.214                         | 0.00    |
| Excinuclease ABC subunit A paralog in greater Bacteroides group                | 410.247                    | 2013.301                      | 0.00    |
| Integrase                                                                      | 9163.519                   | 15684.380                     | 0.00    |
| Ribonucleotide reductase of class III (anaerobic), large subunit (EC 1.17.4.2) | 9822.277                   | 14658.281                     | 0.00    |
| Translation elongation factor G                                                | 9751.141                   | 18514.220                     | 0.00    |

**Table S5.** Norm\_Mean values (DESeq2 normalized counts) of the top 20 genera significantly different ( $p < 0.05$ ) in the carcasses of the birds reared in the conventional and antibiotic-free farms.

| Genus | Norm_Mean_<br>Conventional | Norm_Mean_<br>Antibiotic-free | p-value |
|-------|----------------------------|-------------------------------|---------|
|-------|----------------------------|-------------------------------|---------|

|                         |          |          |      |
|-------------------------|----------|----------|------|
| <i>Aeromonas</i>        | 118.652  | 325.106  | 0.00 |
| <i>Anoxybacillus</i>    | 702.123  | 14.224   | 0.00 |
| <i>Bacillus</i>         | 1032.502 | 183.119  | 0.00 |
| <i>Bacteroides</i>      | 520.731  | 2011.121 | 0.00 |
| <i>Geobacillus</i>      | 616.229  | 40.338   | 0.00 |
| <i>Pedobacter</i>       | 429.521  | 127.025  | 0.00 |
| <i>Prevotella</i>       | 54.755   | 339.248  | 0.00 |
| <i>Ruminococcus</i>     | 142.057  | 361.581  | 0.00 |
| <i>Sphingobacterium</i> | 684.452  | 188.174  | 0.00 |

**Table S6.** Mean values of the InvSimpson, Shannon, Chao1 indexes quantified for the genera identified on carcasses of birds from the conventional and the antibiotic free farm.

| Index      | Mean conventional | Mean antibiotic-free | p-value |
|------------|-------------------|----------------------|---------|
| InvSimpson | 13.312            | 10.738               | 0.44    |
| Shannon    | 3.233             | 3.185                | 0.88    |
| Chao1      | 491.491           | 503.355              | 0.75    |

**Table S7.** Genes classified as antibiotic resistant genes in the Level 2 category and showing normalized mean values significantly different ( $p < 0.05$ ) in the caeca of birds from the conventional and antibiotic free farm. Genes in bold have been identified also on carcasses but with any statistical significant difference in the two tested groups.

| Level function                                                      | Norm_Mean<br>Conventional | Norm_Mean<br>Antibiotic free | pval  |
|---------------------------------------------------------------------|---------------------------|------------------------------|-------|
| Level 3-Aminoglycoside_adenylyltransferases                         |                           |                              |       |
| AminoglycosideN6'-acetyltransferase (EC 2.3.1.82)                   | 8.085                     | 0.743                        | 0.000 |
| <b>Spectinomycin9-O-adenylyltransferase</b>                         | 95.174                    | 19.101                       | 0.000 |
| <b>Streptomycin3"-O-adenylyltransferase (EC 2.7.7.47)</b>           | 115.467                   | 324.204                      | 0.000 |
| Level 3- Beta-lactamase                                             |                           |                              |       |
| Beta-lactamase class A                                              | 6.453                     | 0.181                        | 0.023 |
| <b>Beta-lactamase class C and other penicillin binding proteins</b> | 162.999                   | 29.850                       | 0.000 |
| Beta-lactamaserepressorBlaI                                         | 395.078                   | 36.980                       | 0.001 |
| Metal-dependent hydrolases of the beta-lactamase superfamily II     | 16.522                    | 2.465                        | 0.000 |
| <b>Negative regulator of beta-lactamase expression</b>              | 5.177                     | 0.897                        | 0.003 |
| Regulatory protein BlaR1                                            | 23.199                    | 0.507                        | 0.000 |
| Level 3- BlaR1_Family_Regulatory_Sensor-transducer_Disambiguation   |                           |                              |       |
| Beta-lactamase repressor BlaI                                       | 0                         | 51.574                       | 0.000 |
| <b>Regulatory sensor-transducer. BlaR1/MecR1 family</b>             | 1031.434                  | 412.738                      | 0.000 |

|                                                                                                                                               |          |          |       |
|-----------------------------------------------------------------------------------------------------------------------------------------------|----------|----------|-------|
| Transcriptional regulator. MecI family                                                                                                        | 33.457   | 83.803   | 0.001 |
| Transcriptional repressor. BlaI/MecI family                                                                                                   | 261.786  | 462.161  | 0.000 |
| Level 3-Erythromycin_resistance                                                                                                               |          |          |       |
| rRNA adenine N-6-methyltransferase (EC 2.1.1.48)                                                                                              | 190.674  | 712.307  | 0.000 |
| rRNA adenine N-6-methyltransferase (EC 2.1.1.48) (Macrolide-lincosamide-streptogramin B resistance protein) (Erythromycin resistance protein) | 23.962   | 1.709    | 0.000 |
| rRNA adenine N-6-methyltransferase (erm/ksgA)                                                                                                 | 3.797    | 16.206   | 0.000 |
| Level 3- Methicillin_resistance_in_Staphylococci                                                                                              |          |          |       |
| FmtA protein involved in methicillin resistance                                                                                               | 3.757    | 0.481    | 0.017 |
| Transposase for insertion sequence-like element IS431mec                                                                                      | 0.618    | 4.946    | 0.005 |
| UDP-N-acetylmuramoylalanyl-D-glutamate--2.6-diaminopimelate ligase (EC 6.3.2.13)                                                              | 2541.379 | 0        | 0.000 |
| Level 3- MexE-MexF-OprN_Multidrug_Efflux_System                                                                                               |          |          |       |
| <b>Multidrug efflux transporter MexF</b>                                                                                                      | 67.028   | 32.709   | 0.000 |
| <b>Transcriptional regulator MexT</b>                                                                                                         | 1.374    | 0.113    | 0.089 |
| Level 3- Multidrug_Resistance_Efflux_Pumps                                                                                                    |          |          |       |
| <b>Acriflavin resistance protein</b>                                                                                                          | 2292.452 | 7129.559 | 0.000 |
| <b>Macrolide export ATP-binding/permease protein MacB (EC 3.6.3-)</b>                                                                         | 1036.871 | 426.512  | 0.000 |
| <b>Macrolide-specific efflux protein MacA</b>                                                                                                 | 210.917  | 668.432  | 0.000 |
| <b>Multi antimicrobial extrusion protein (Na+//drug antiporter-). MATE family of MDR efflux pumps</b>                                         | 8815.673 | 3125.98  | 0.000 |
| Multidrug efflux pump component MtrF                                                                                                          | 19.153   | 2.949    | 0.000 |
| <b>Multidrug efflux RND membrane fusion protein MexC</b>                                                                                      | 4.113    | 1.517    | 0.022 |
| <b>Multidrug efflux RND transporter MexD</b>                                                                                                  | 19.084   | 6.185    | 0.002 |
| Multidrug resistance efflux pump PmrA                                                                                                         | 20.989   | 3.974    | 0.000 |
| Multidrug-efflux transporter. major facilitator superfamily (MFS) (TC 2.A.1)                                                                  | 14.734   | 47.616   | 0.000 |
| Transcription regulator of multidrug efflux pump operon. TetR (AcrR) family                                                                   | 22.021   | 4.136    | 0.000 |
| Transcription repressor of multidrug efflux pump acrAB operon. TetR(AcrR) family                                                              | 4.972    | 24.051   | 0.001 |
| Multiple antibiotic resistance protein MarA                                                                                                   | 0.307    | 3.607    | 0.003 |
| Level3- Polymyxin_Synthetase_Gene_Cluster_in_Bacillus                                                                                         |          |          |       |
| Polymyxin synthetase PmxA                                                                                                                     | 1.953    | 0.255    | 0.029 |
| Level 3- Resistance_to_fluoroquinolones                                                                                                       |          |          |       |
| Efflux pump Lde                                                                                                                               | 25.941   | 69.768   | 0.024 |

|                                                                       |          |          |       |
|-----------------------------------------------------------------------|----------|----------|-------|
| <b>Topoisomerase IV subunit B (EC 5.99.1-)</b>                        | 1796.567 | 0        | 0.000 |
| Level 3- Resistance_to_Vancomycin                                     |          |          |       |
| Protein VanZ                                                          | 1.472    | 0.085    | 0.027 |
| <b>Sensor histidine kinase VanS (EC 2.7.3)</b>                        | 847.058  | 136.855  | 0.000 |
| <b>Vancomycin B-type resistance protein VanW</b>                      | 882.44   | 147.837  | 0.000 |
| Vancomycin B-type resistance protein VanX                             | 65.047   | 29.341   | 0.000 |
| Vancomycin resistance protein VanH                                    | 11.766   | 4.74     | 0.015 |
| <b>Vancomycin response regulator VanR</b>                             | 1340.459 | 856.222  | 0.005 |
| Vancomycin Teicoplanin A-type resistance protein VanA                 | 44.3     | 3.047    | 0.000 |
| Level 3- Streptococcus_pneumoniae_Vancomycin_Tolerance_Locus          |          |          |       |
| ABC transporter. ATP-binding protein Vex2                             | 84.104   | 8.606    | 0.000 |
| Level 3- Streptothricin_resistance                                    |          |          |       |
| <b>Streptothricin acetyltransferase. Streptomyces lavendulae type</b> | 149.21   | 248.089  | 0.001 |
| Level 3- The_mdtABCD_multidrug_resistance_cluster                     |          |          |       |
| <b>Multidrug transporter MdtB</b>                                     | 16.731   | 79.835   | 0.005 |
| <b>Multidrug transporter MdtC</b>                                     | 15.583   | 69.334   | 0.002 |
| <b>Multidrug transporter MdtD</b>                                     | 7.577    | 32.849   | 0.003 |
| <b>Probable RND efflux membrane fusion protein</b>                    | 709.051  | 1590.562 | 0.000 |
| <b>Response regulator BaeR</b>                                        | 53.501   | 23.835   | 0.002 |
| Sensory histidine kinase BaeS                                         | 16.449   | 35.314   | 0.019 |
